# Supplementary figures and images for: Development of a Multilocus Sequence Typing Scheme for Giardia intestinalis
Source: MDPI journal article supplement (doi:10.3390/genes11070764), 2020-07-08

A

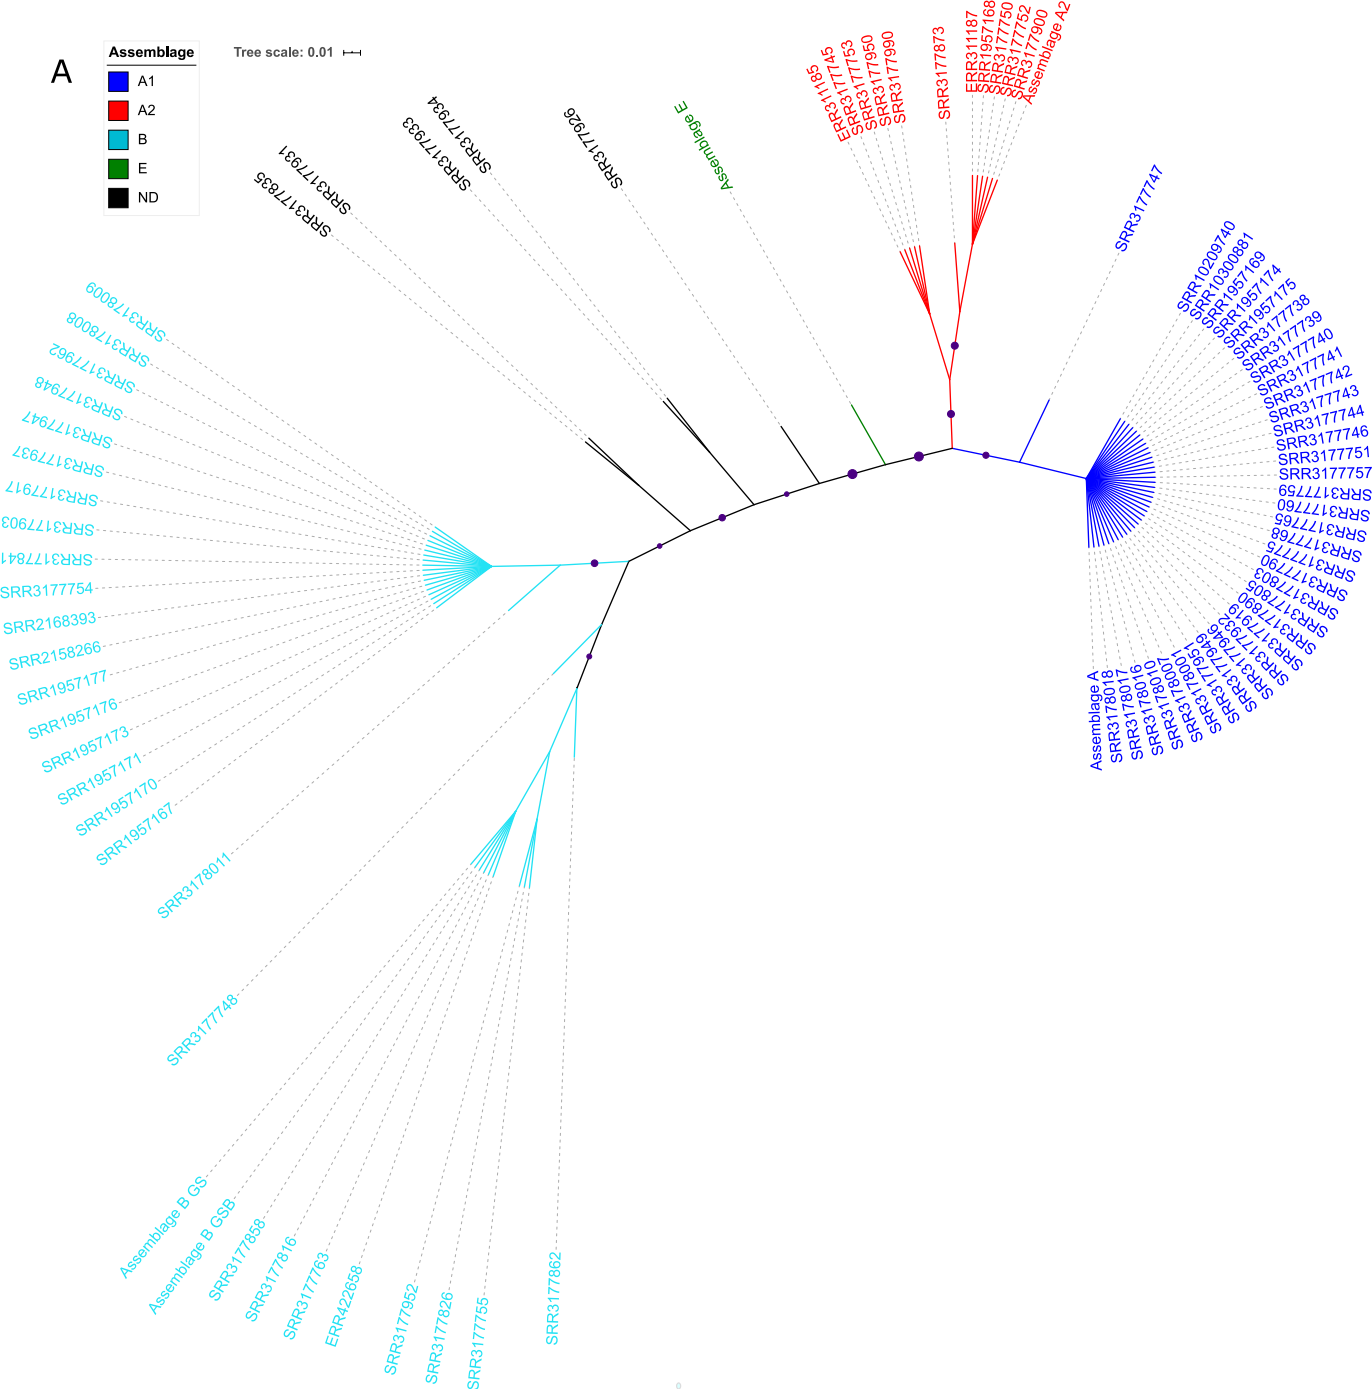

B

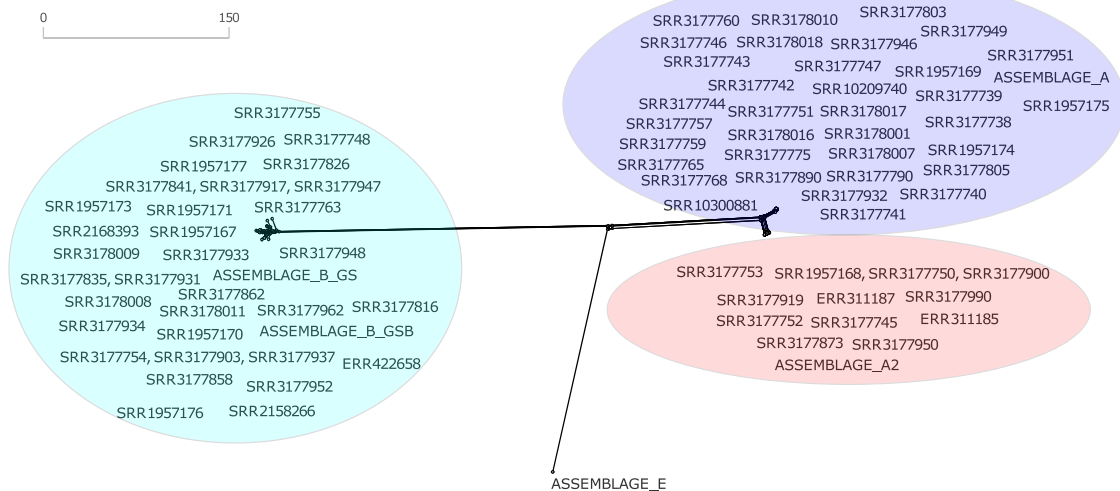

Supplement: s1 [file s1]

A

Tree scale: 0.01

## Assemblage

- A1
- A2
- B
- E
- ND

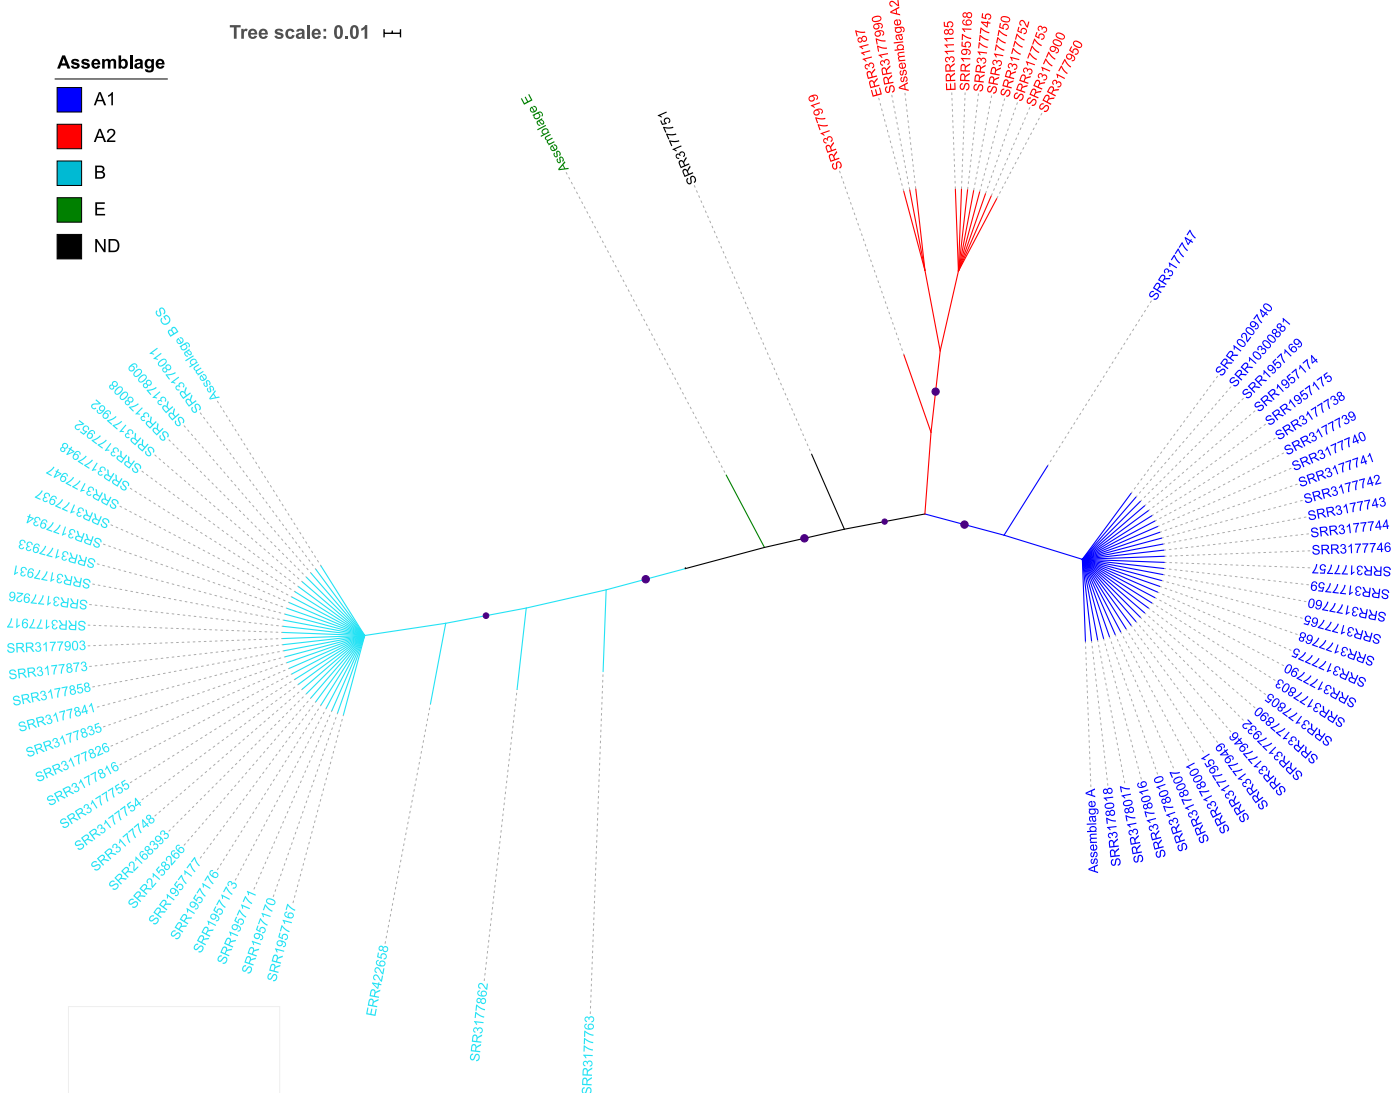

B

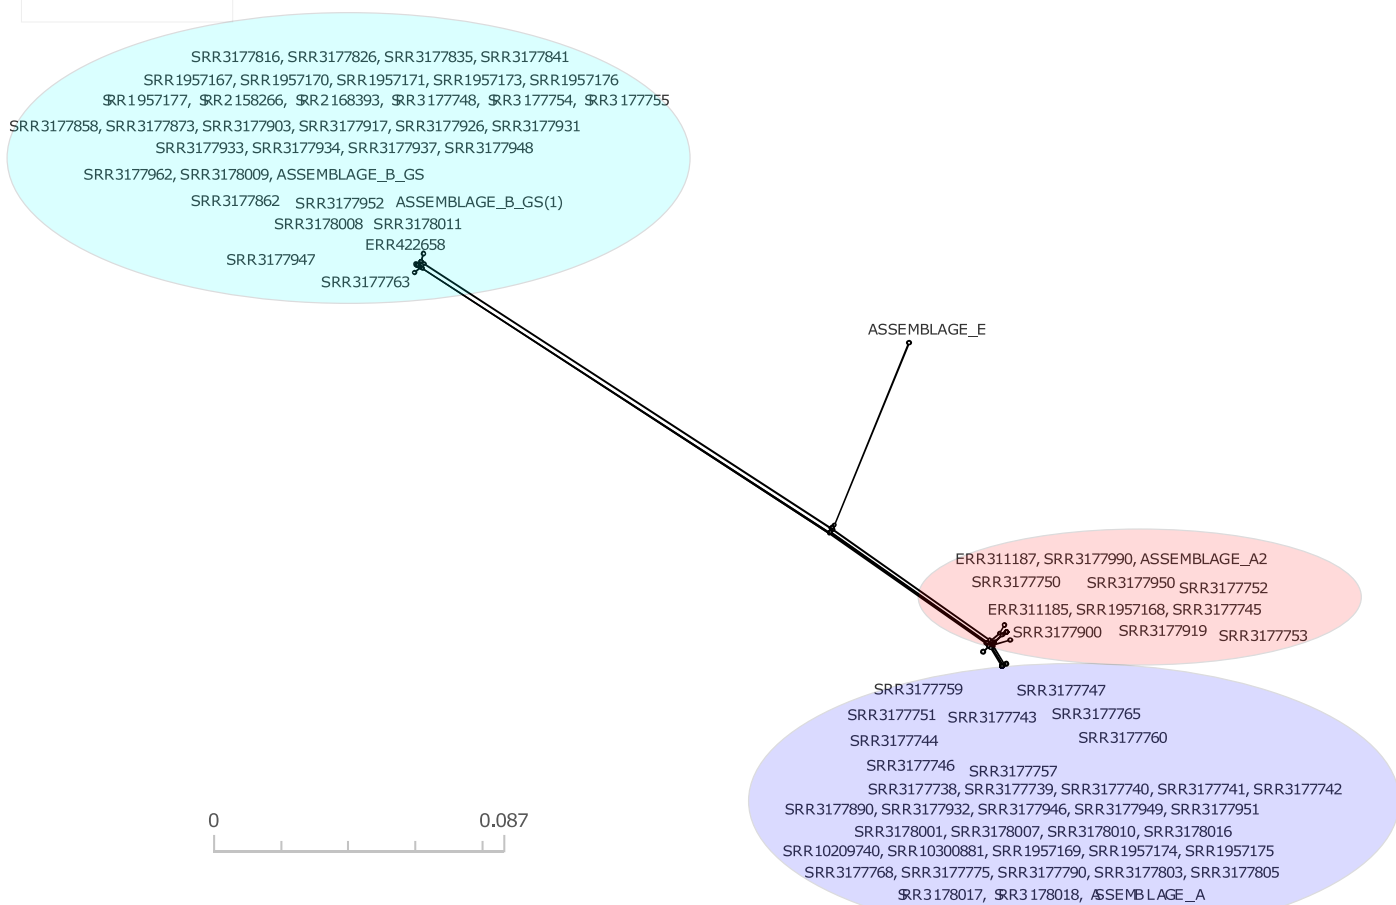

Supplement: s1 [file s1]

A

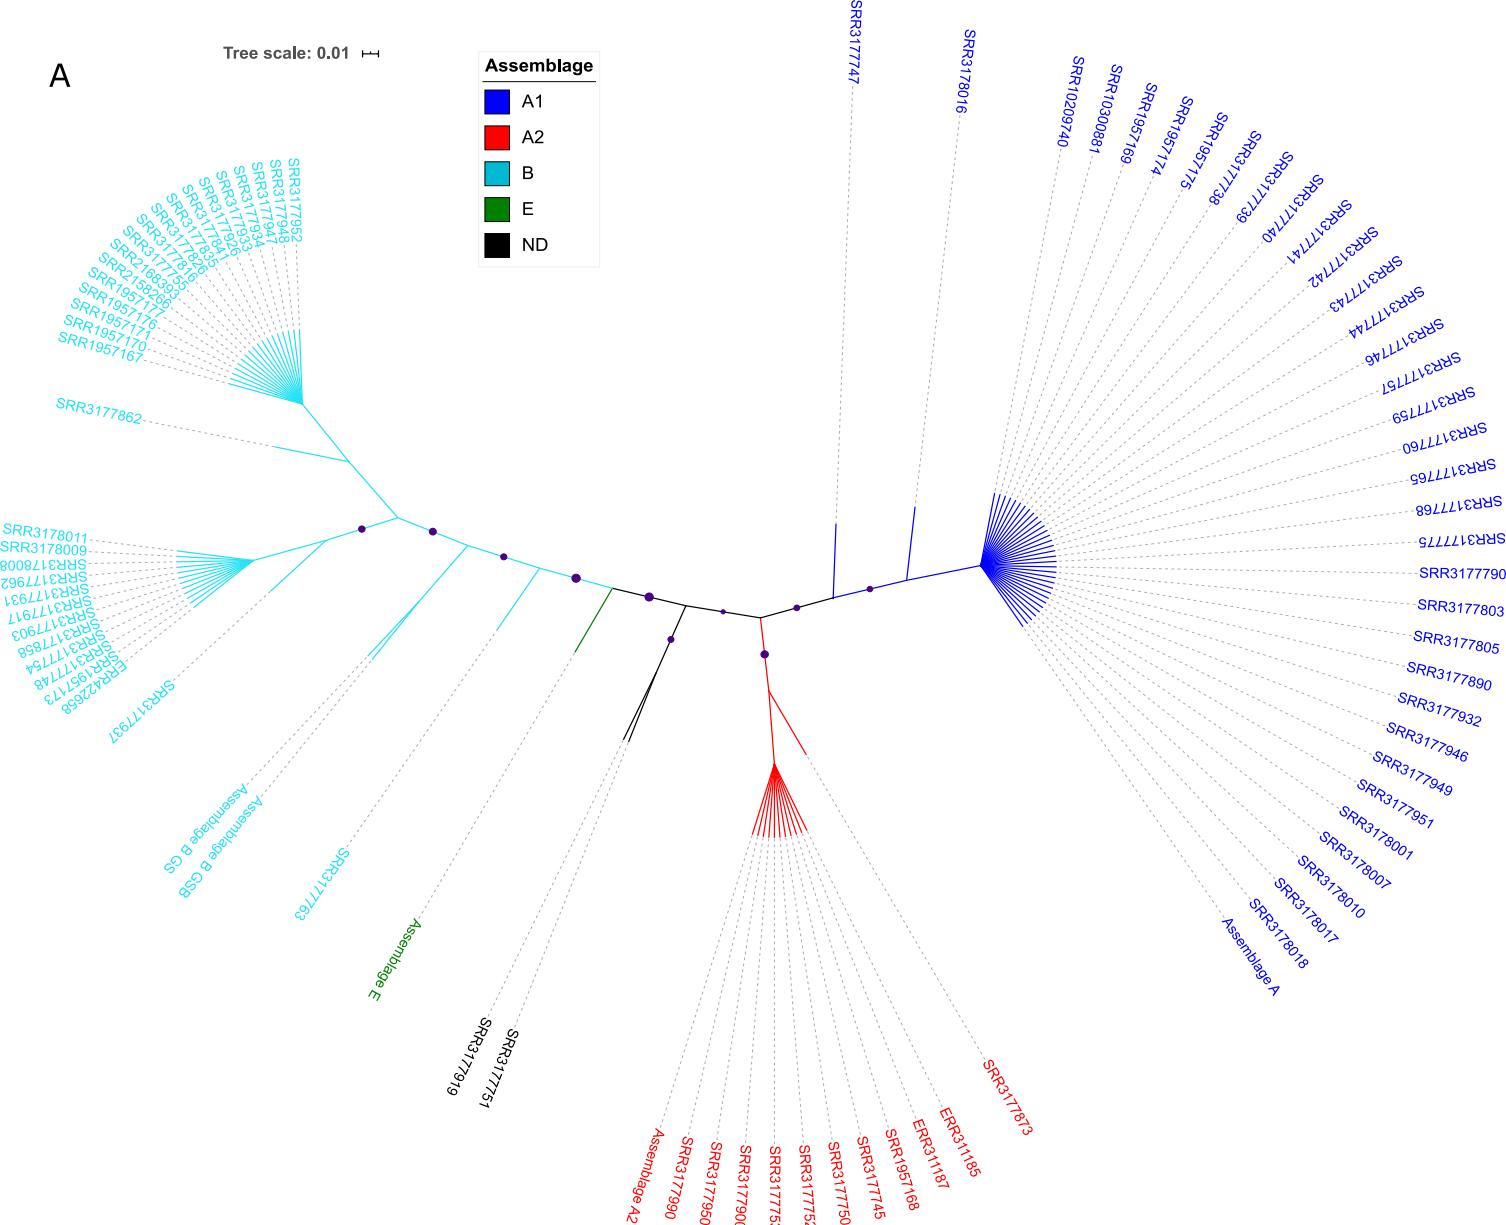

B

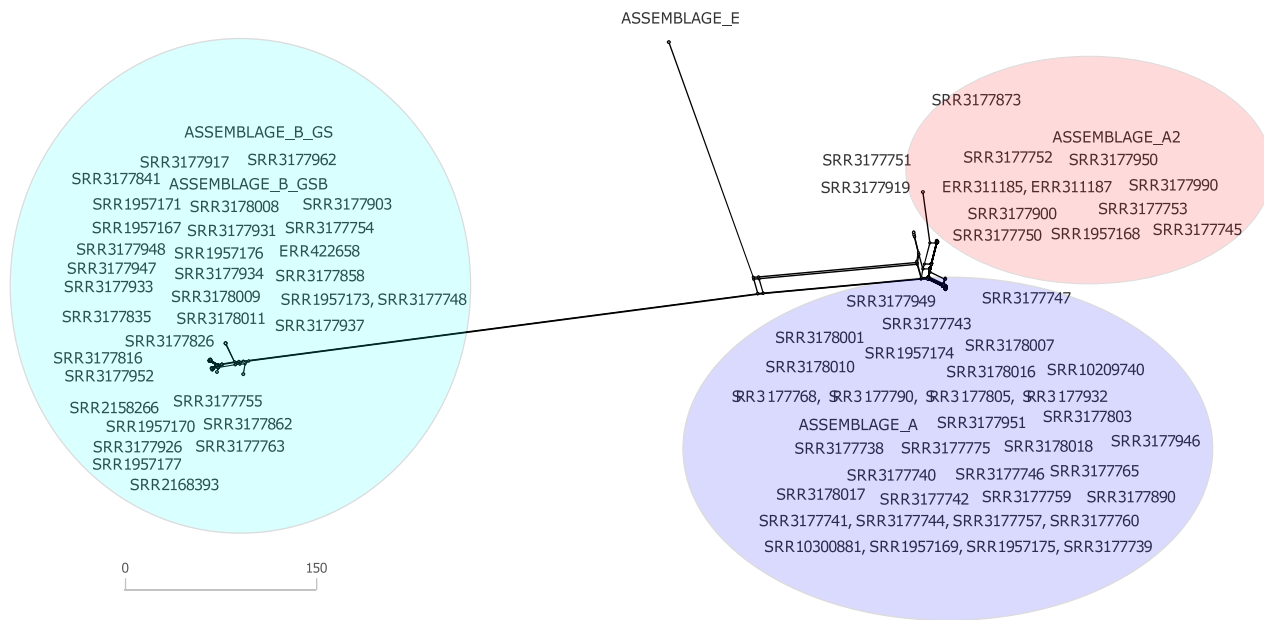

Supplement: s1 [file s1]

I

## Assemblage

|                                                                                 |    |
|---------------------------------------------------------------------------------|----|
|    | A1 |
|    | A2 |
|   | B  |
|  | E  |
|  | ND |

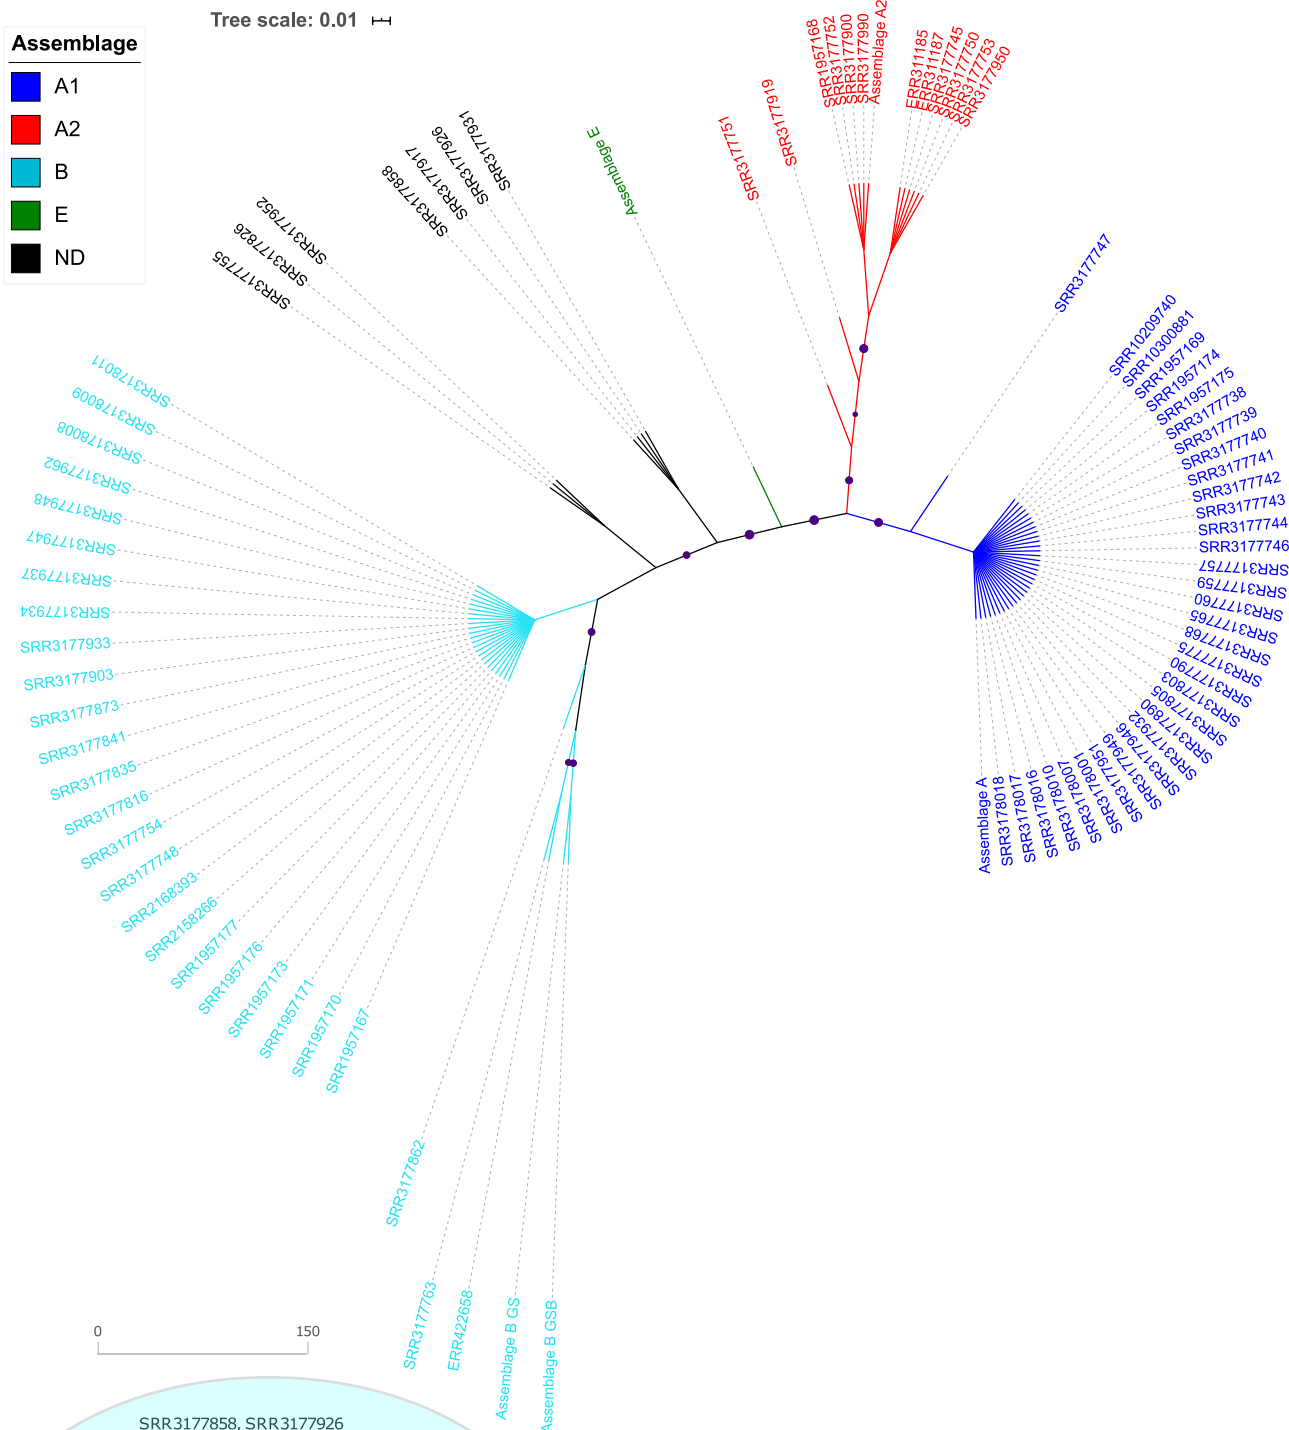

B

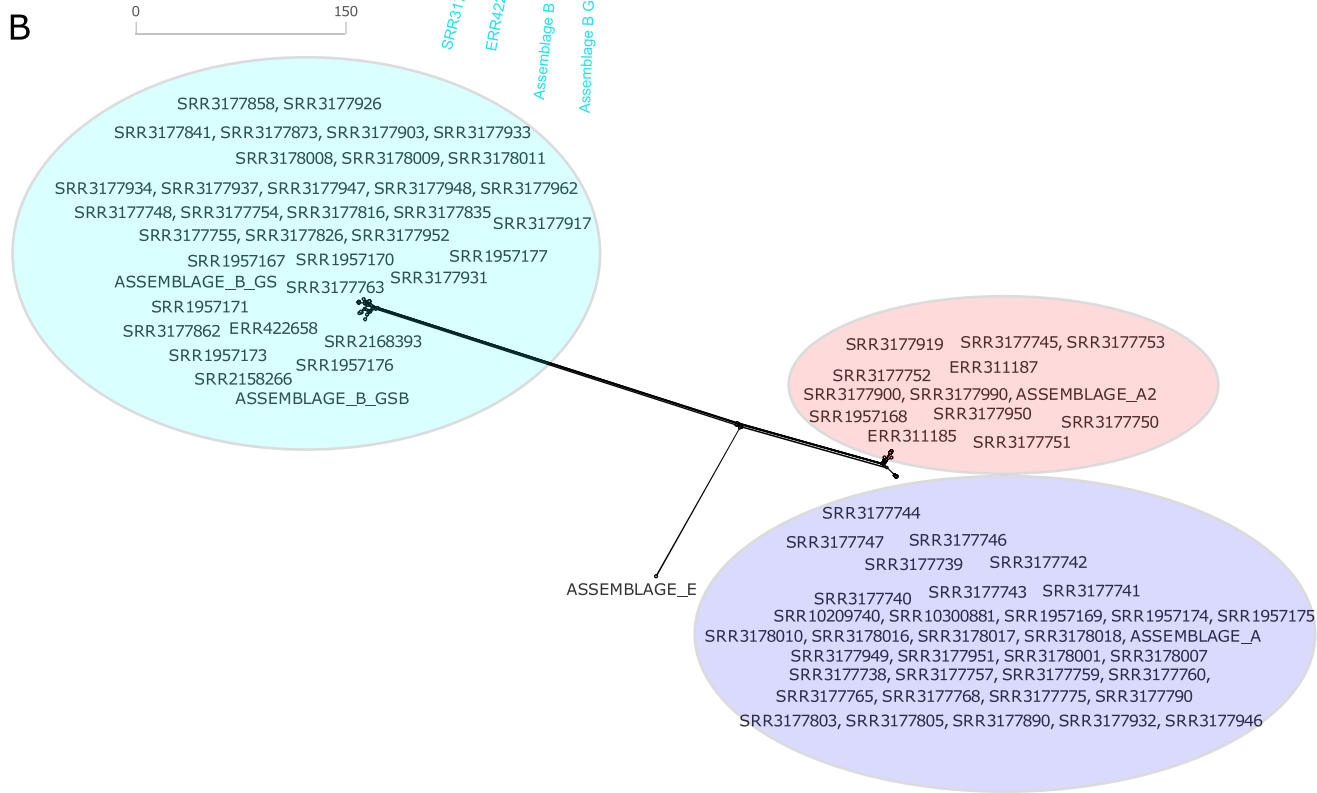

Supplement: s1 [file s1]

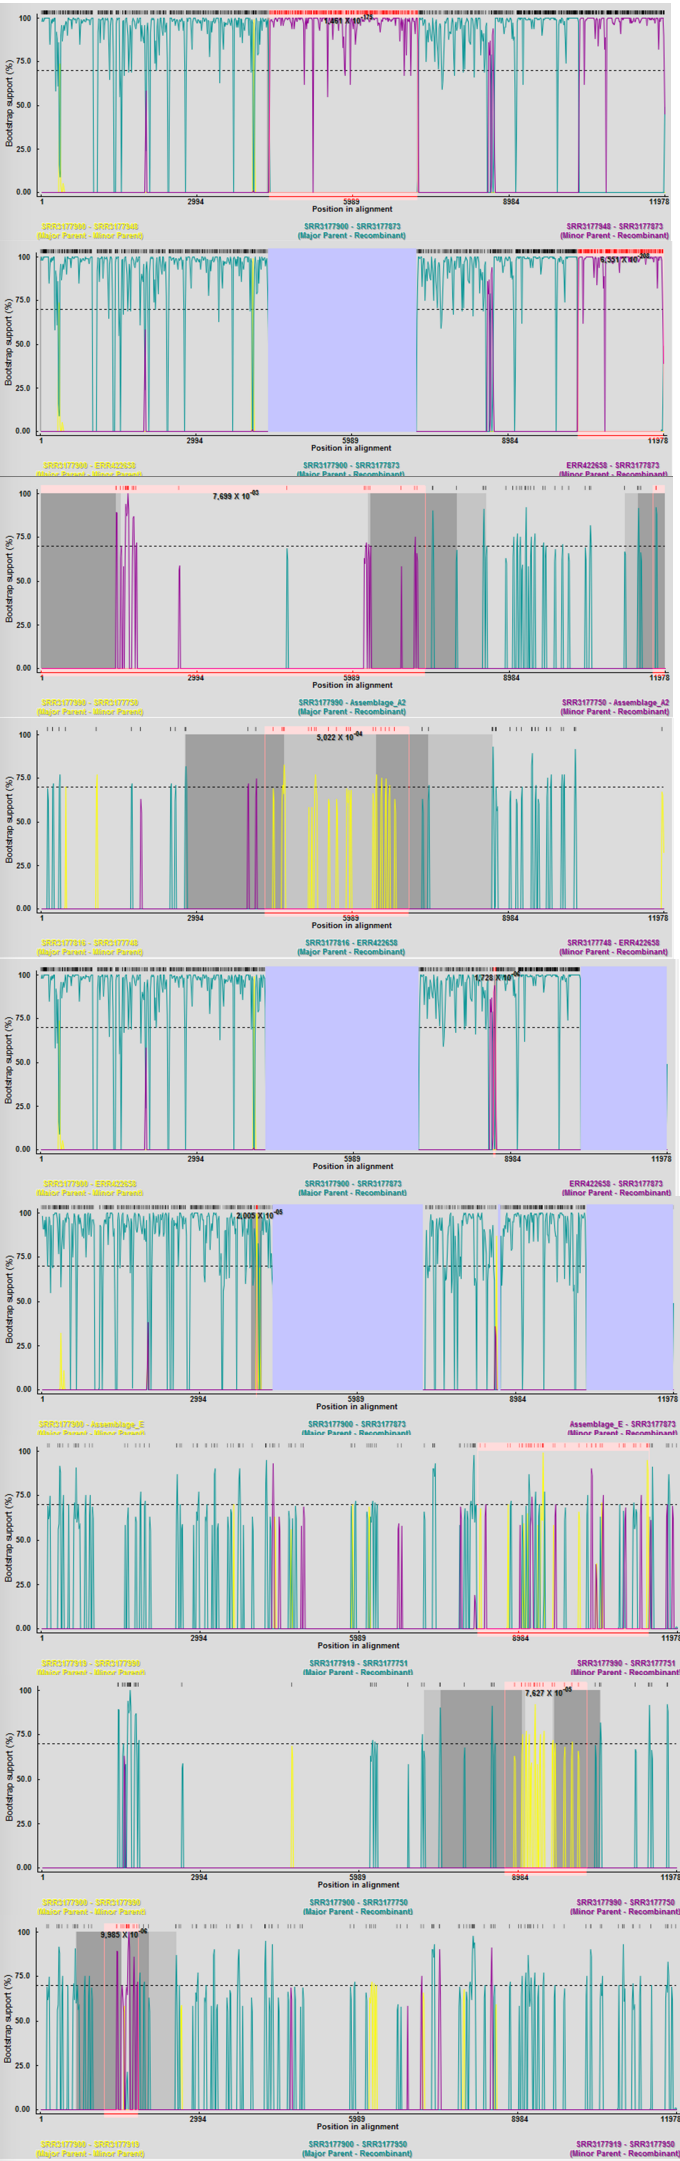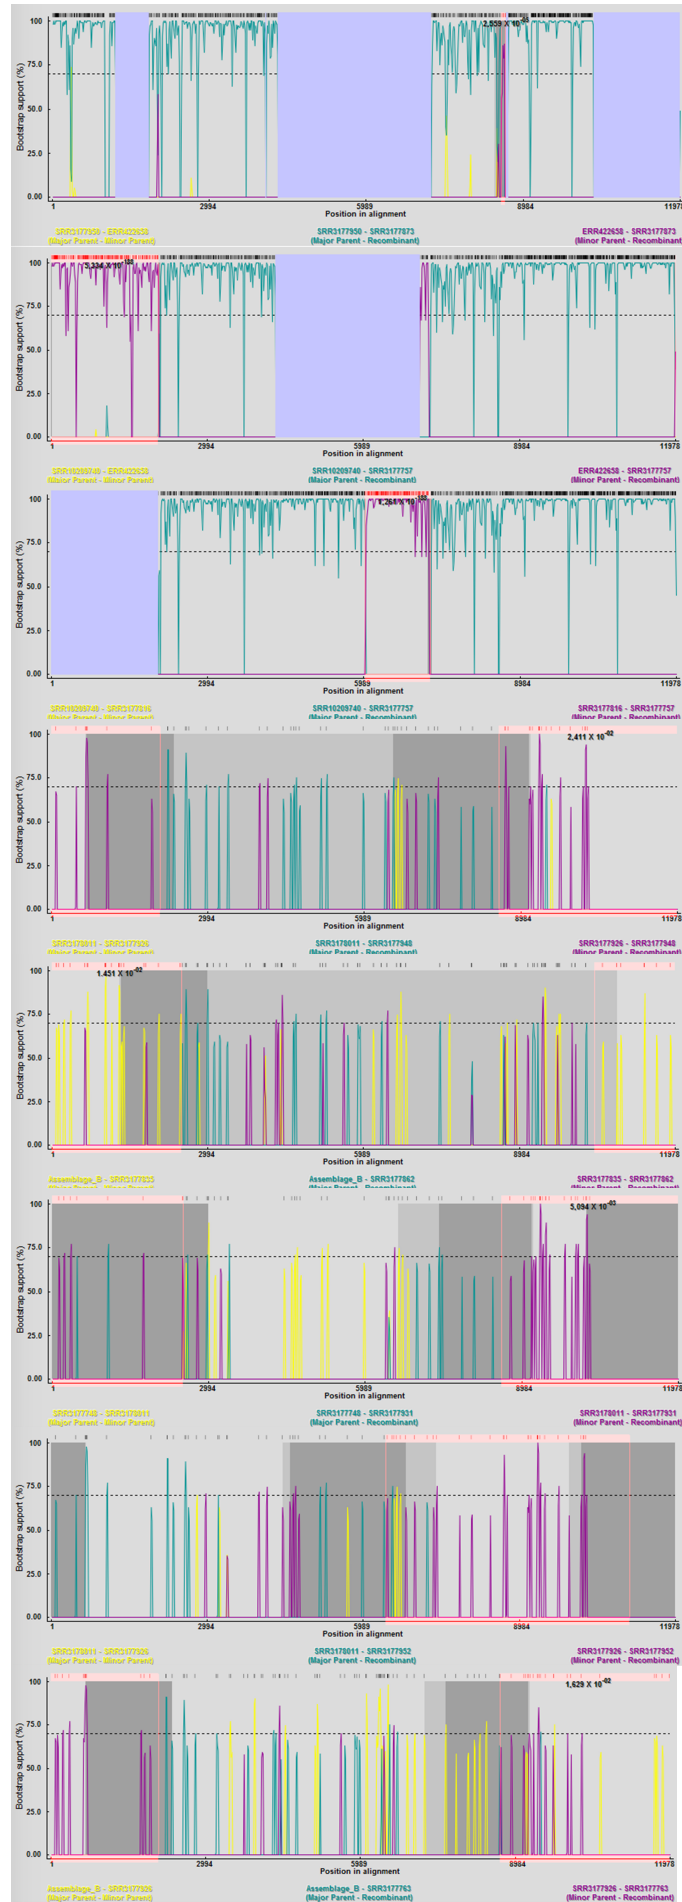

Supplement: s1 [file s1]

II

A

## Assemblage

 A1  
 A2  
 B  
 E  
 ND

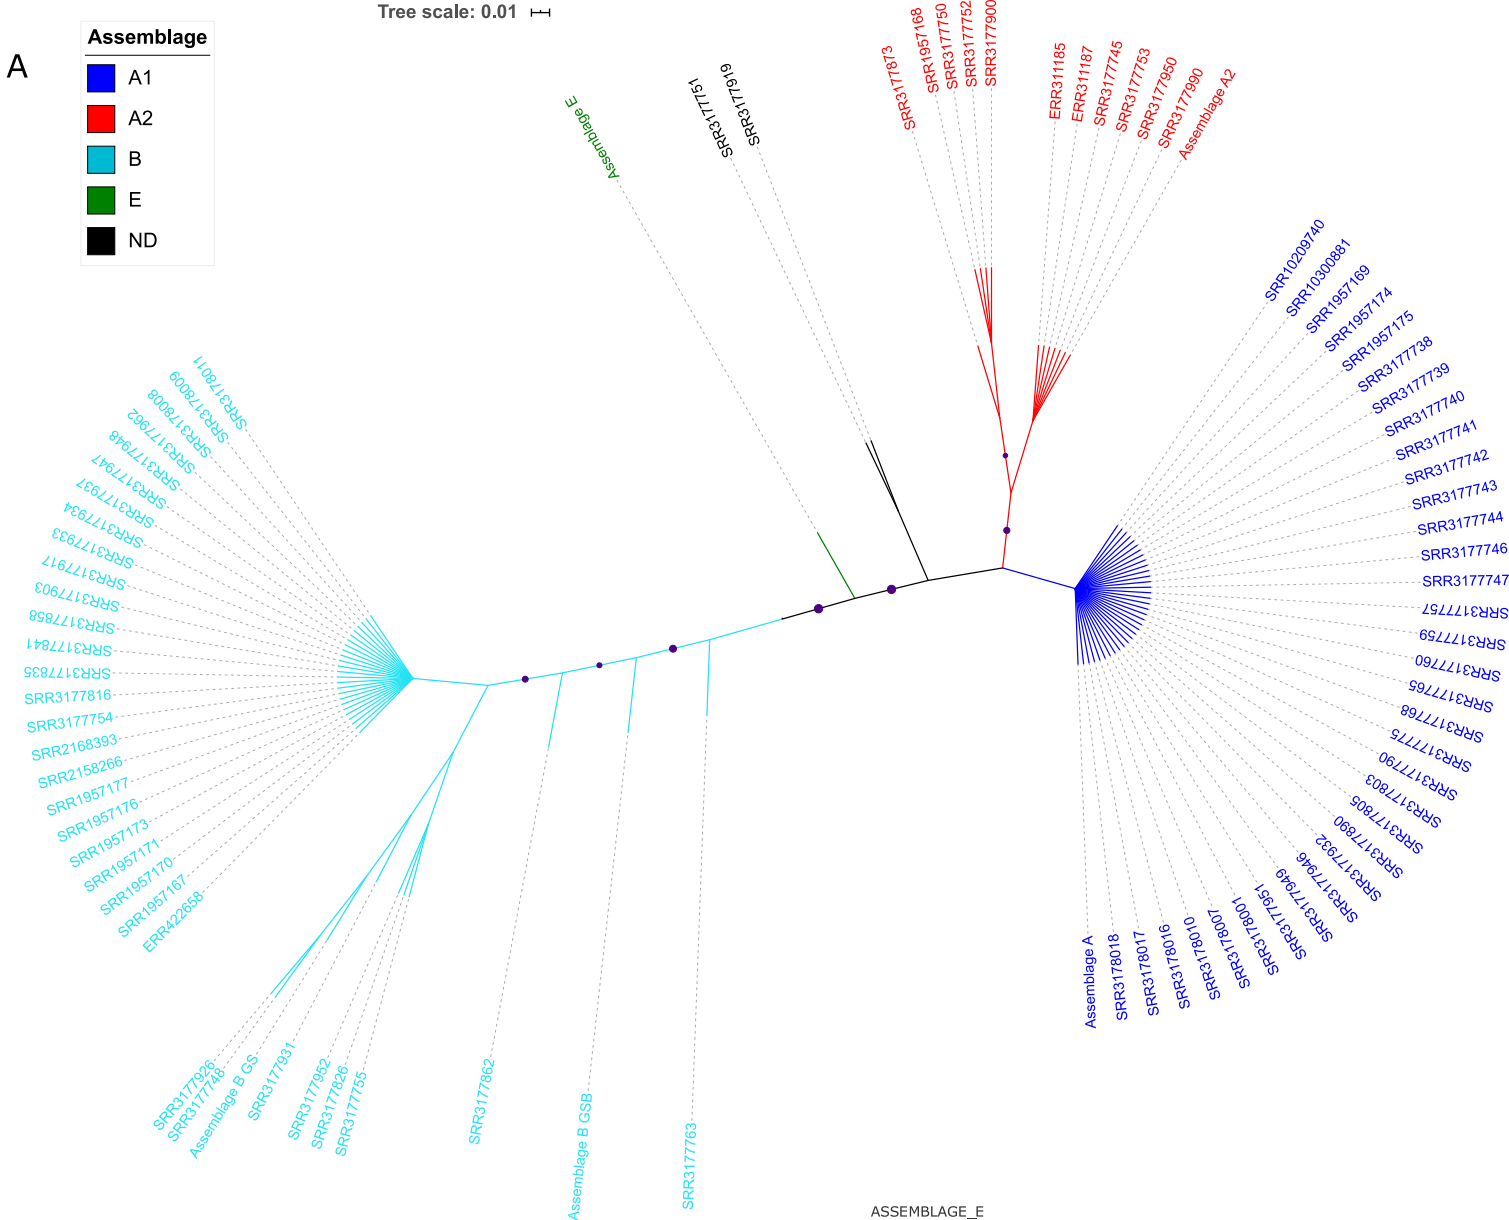

**B**

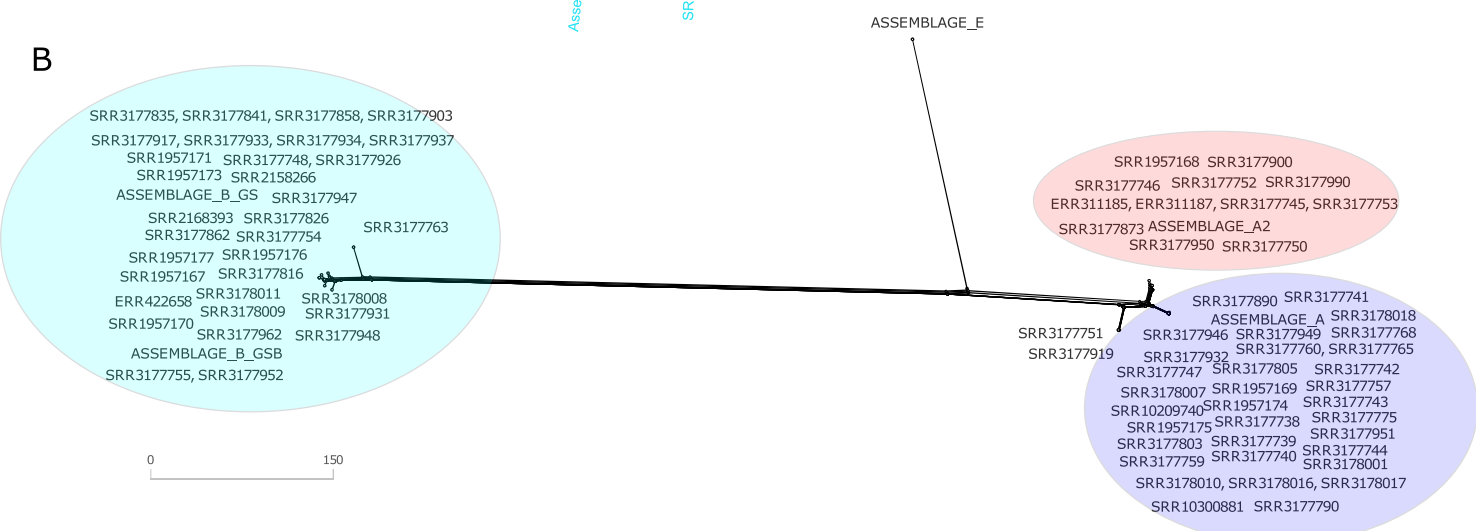

Supplement: s1 [file s1]

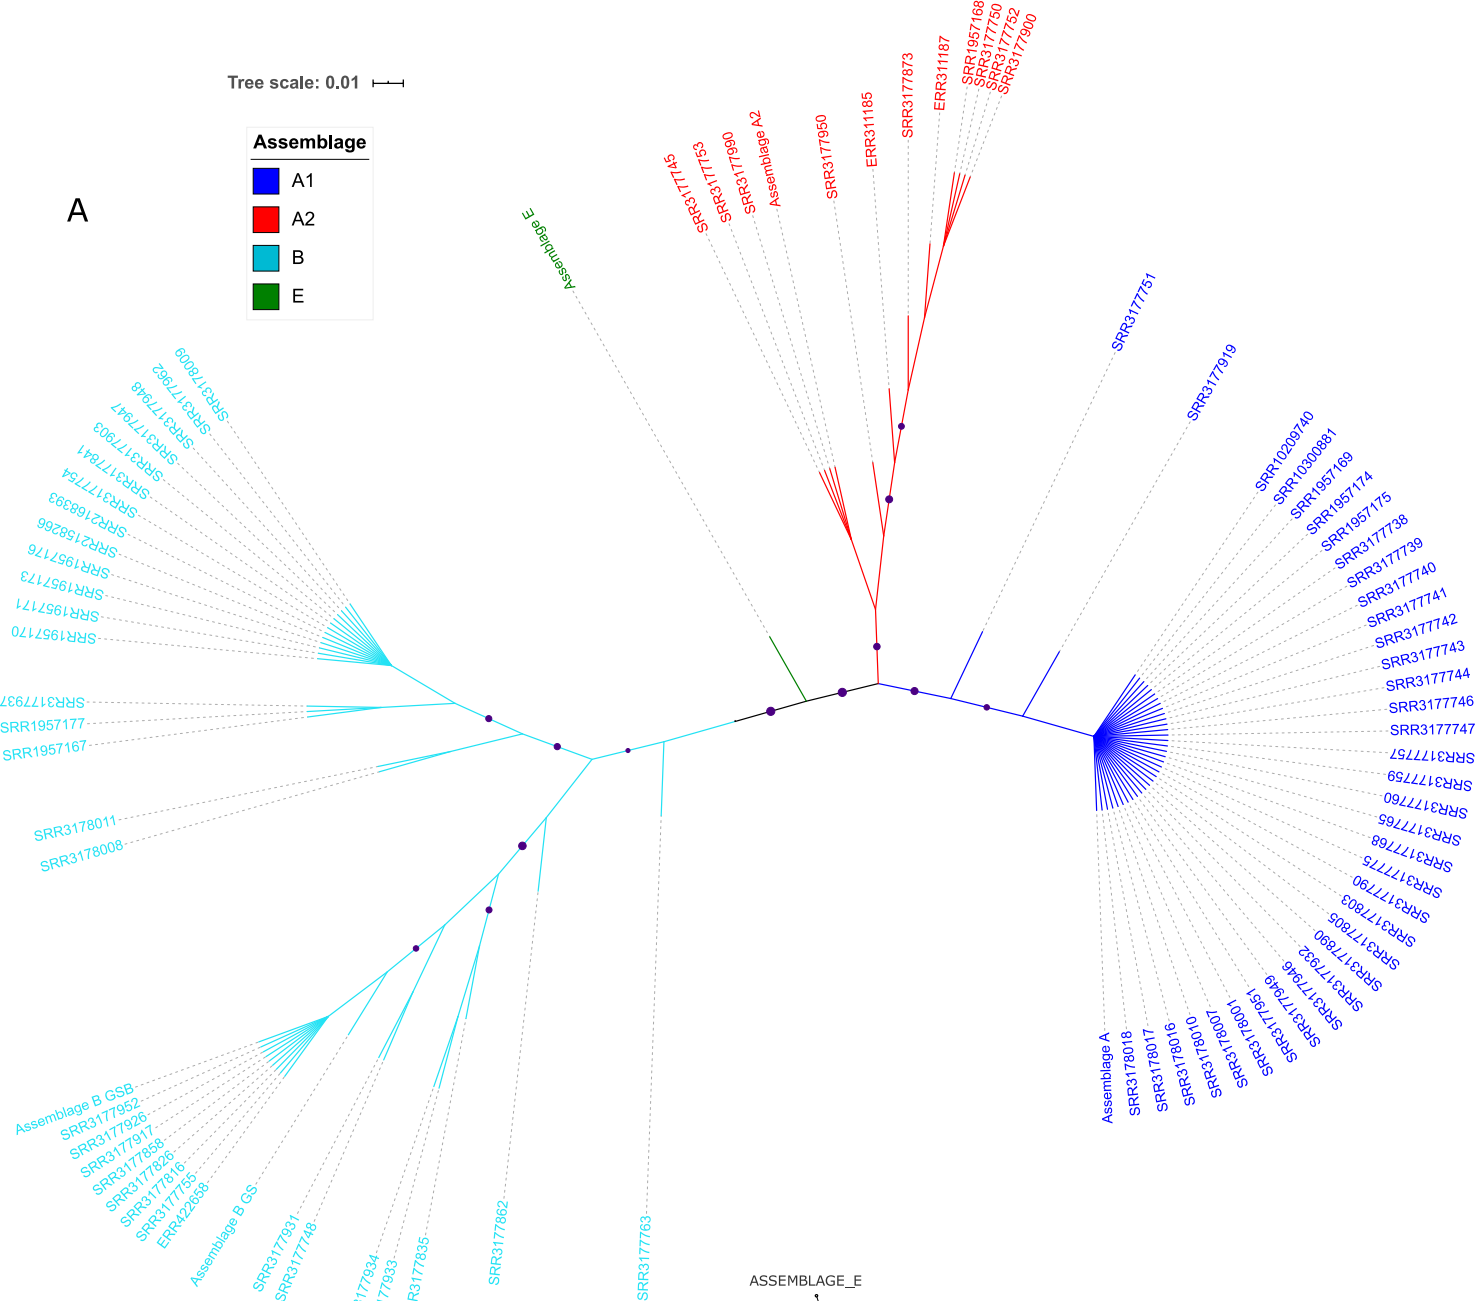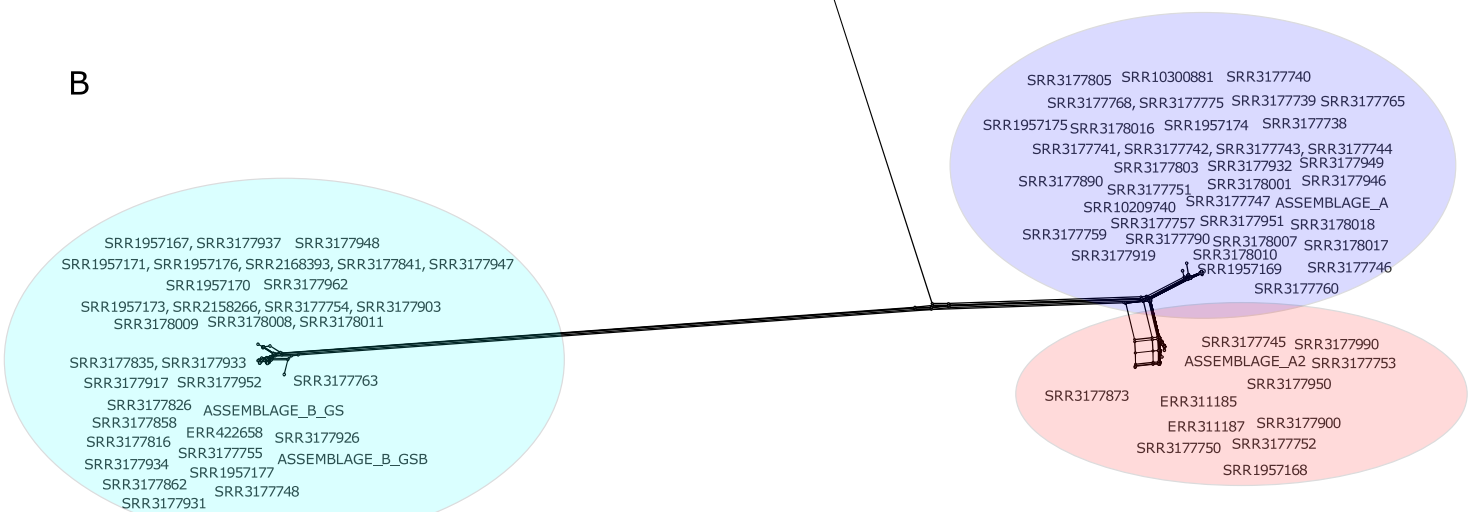

0 147.044

Supplement: s1 [file s1]

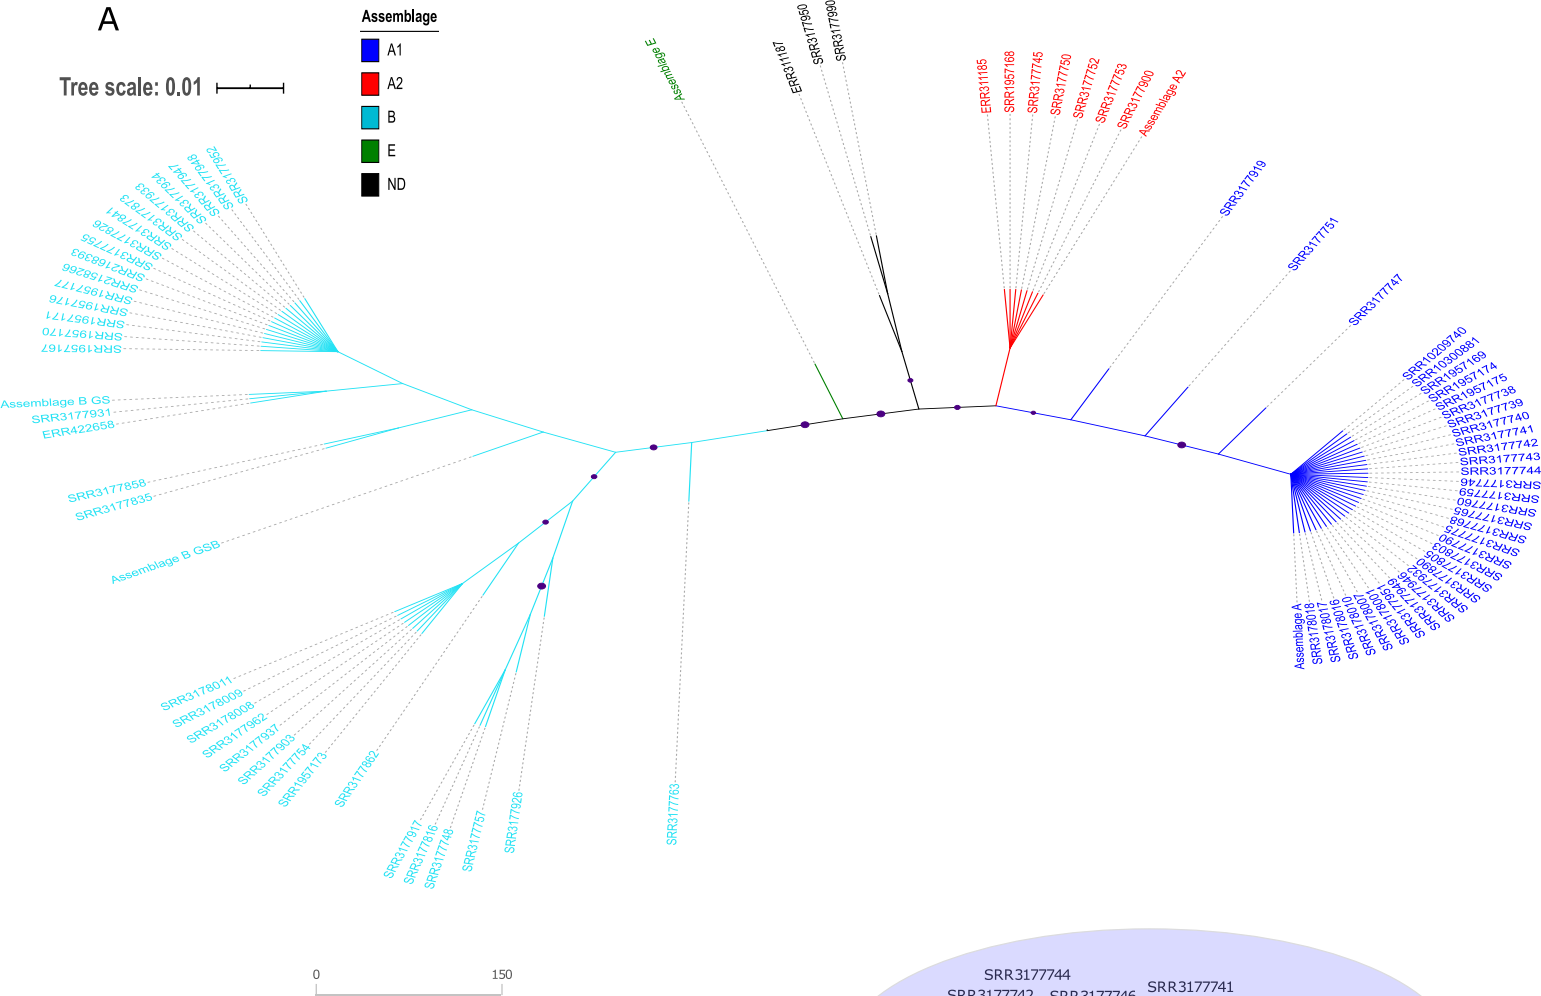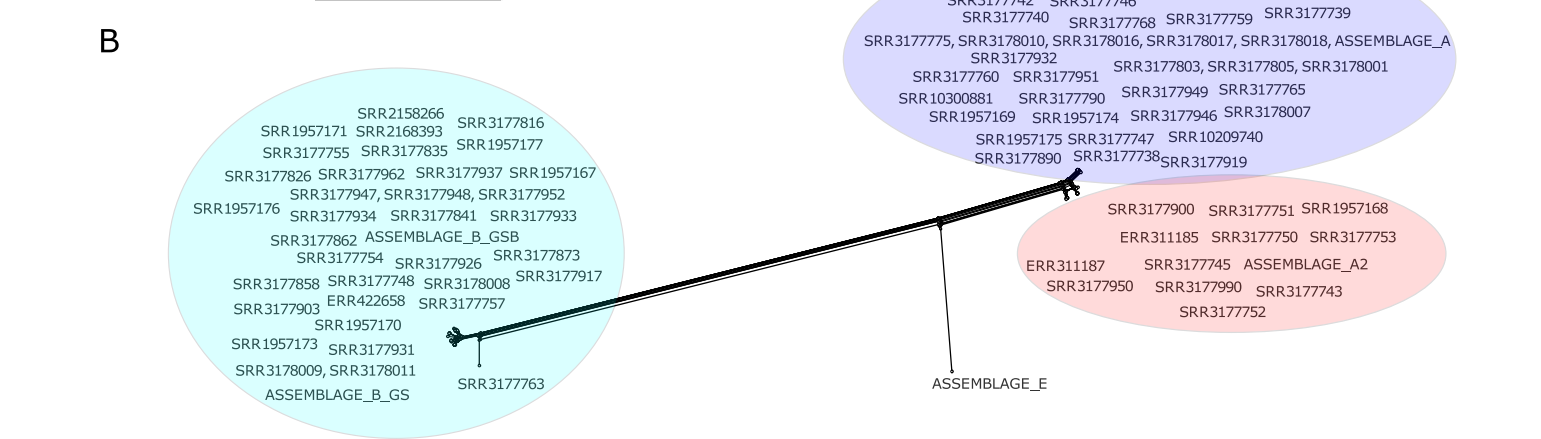

Supplement: s1 [file s1]

A

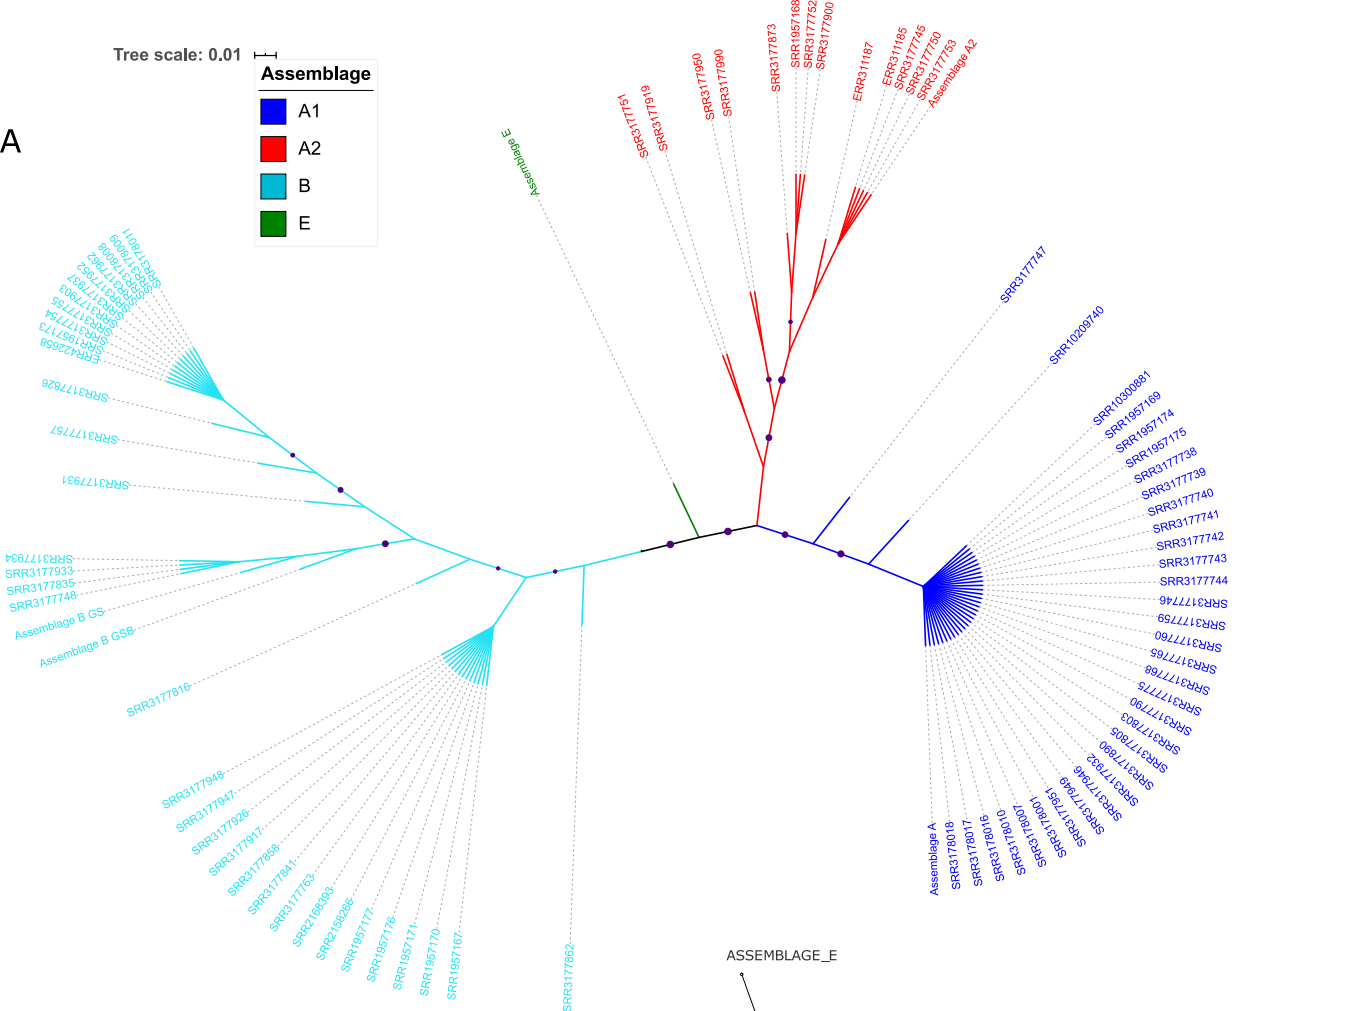

B

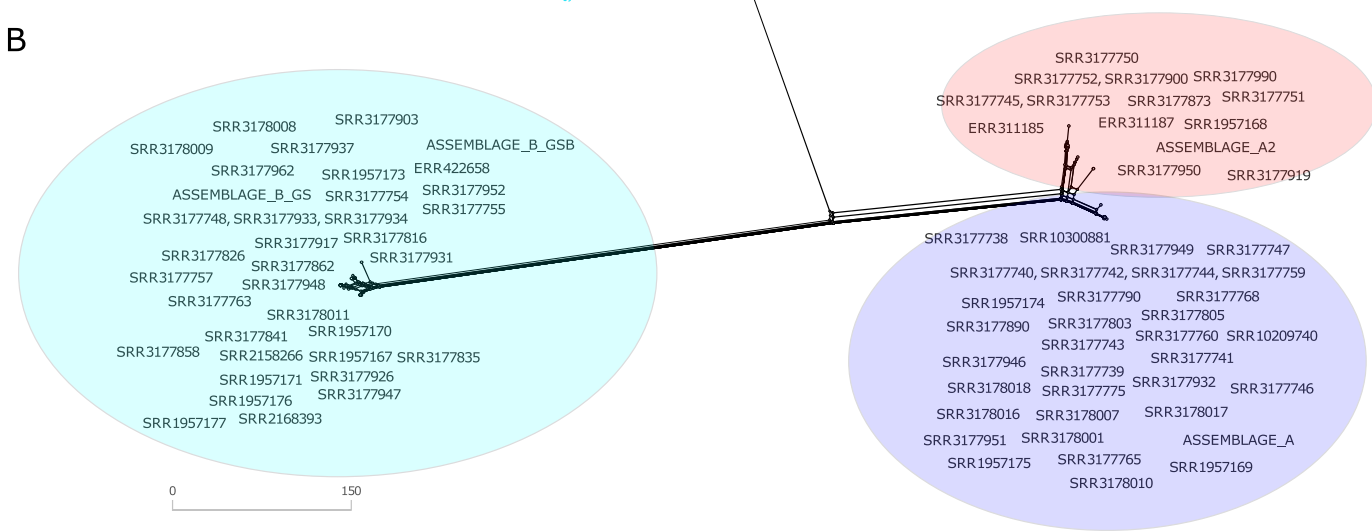

Supplement: s1 [file s1]
